# Supplementary material for: Giant Cells of Various Lesions Are Characterised by Different Expression Patterns of HLA-Molecules and Molecules Involved in the Cell Cycle, Bone Metabolism, and Lineage Affiliation: An Immunohistochemical Study with a Review of the Literature
Source: MDPI journal article supplement (doi:10.3390/cancers15143702), 2023-07-21
Supplement: s1 [file s1]

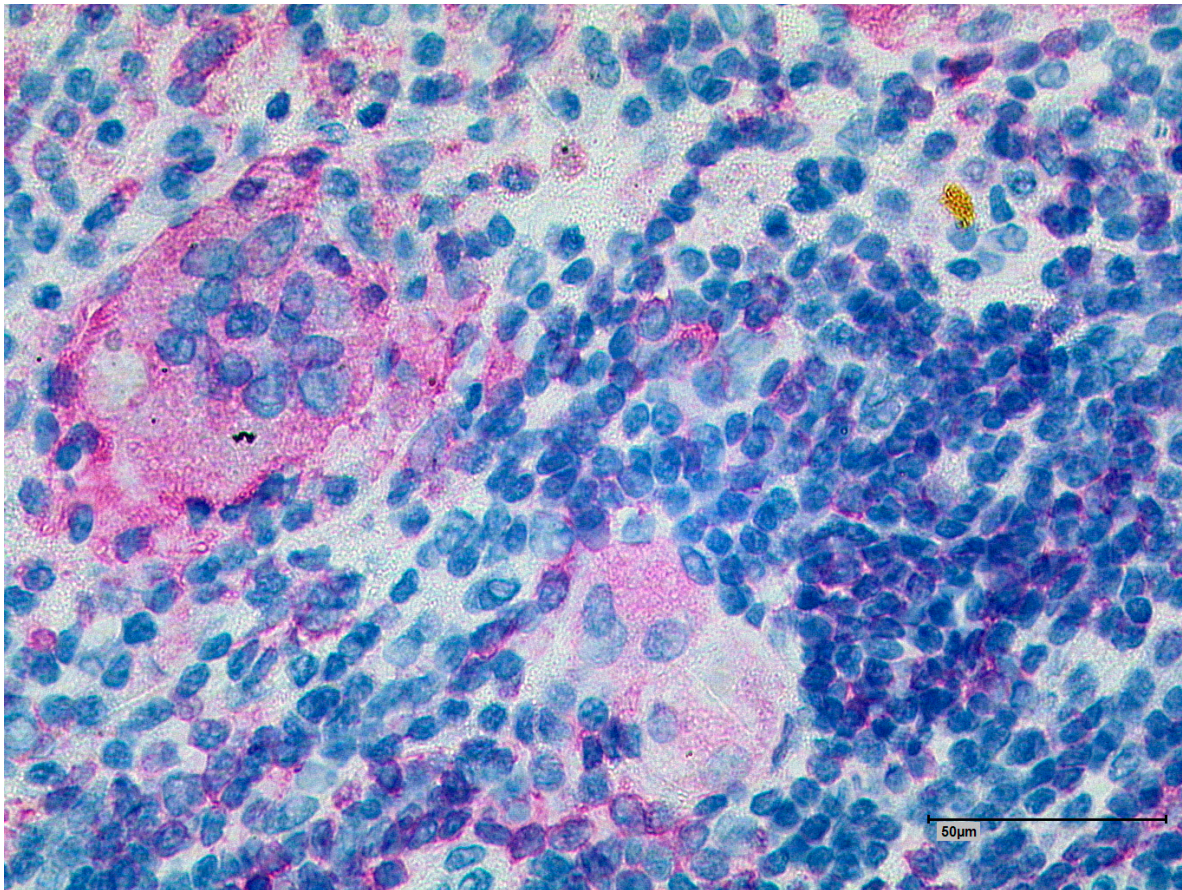

Figure S1: HLA-DR-staining of sample 13 (foreign body granuloma)



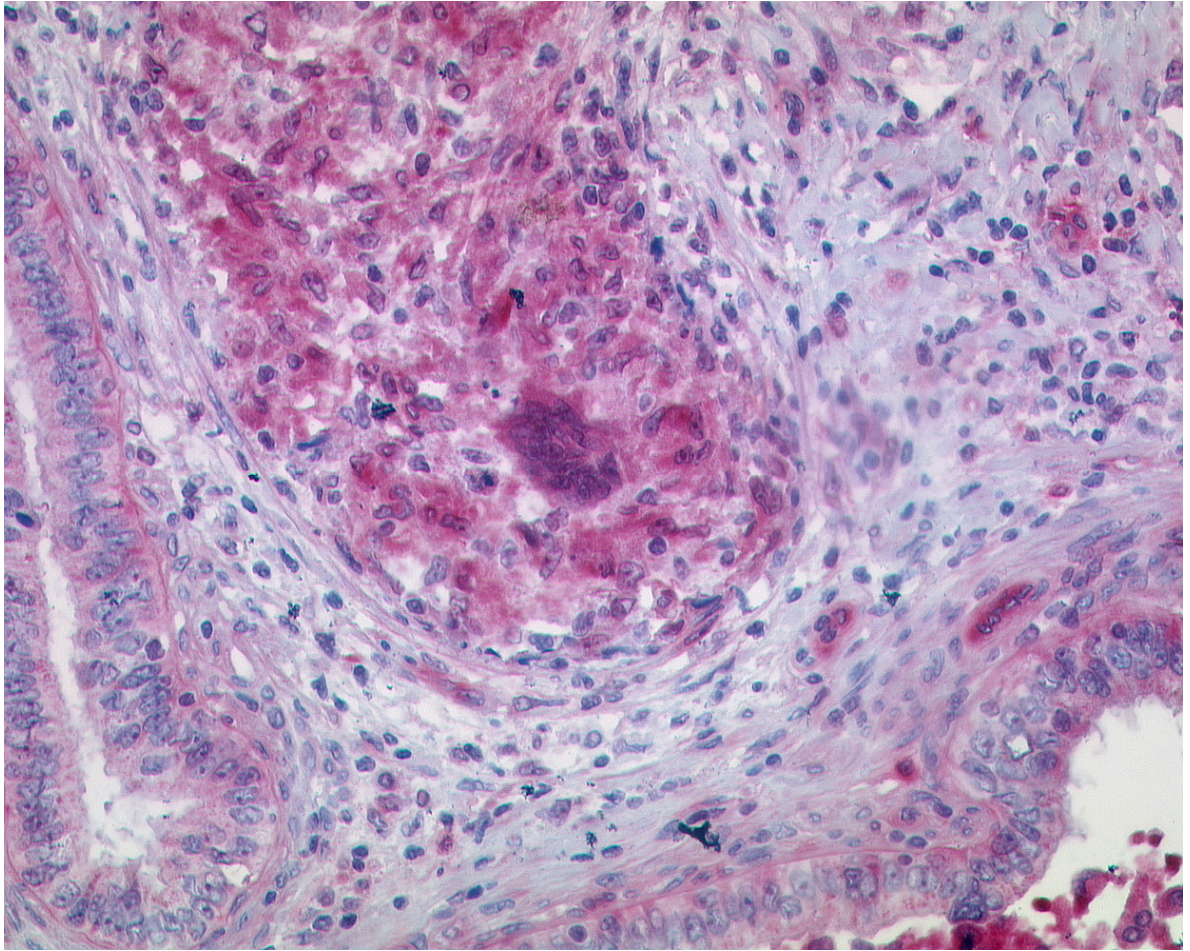

Figure S2: Cyclin E-staining of sample 6 (sarcoidosis)

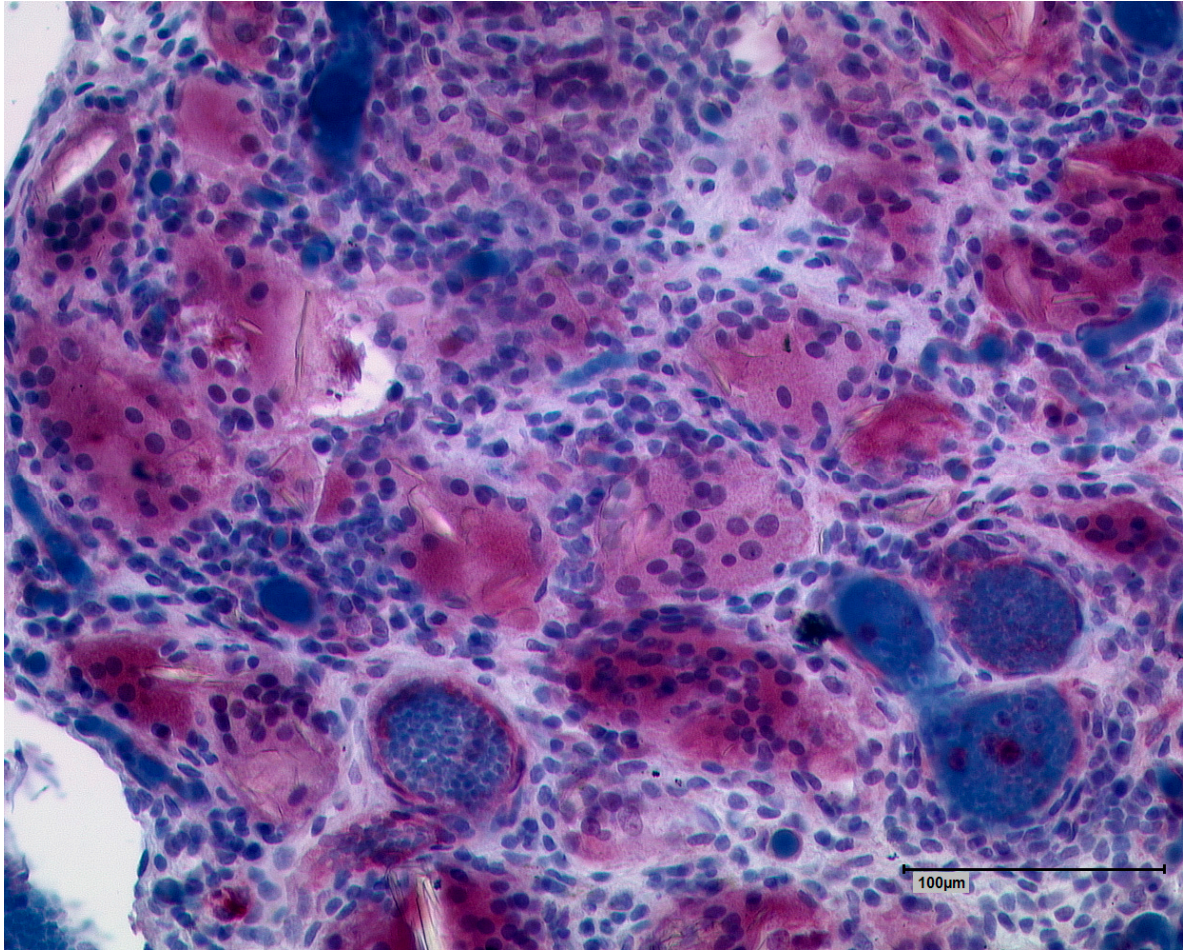

Figure S3: Cyclin E-staining of sample 14 (foreign body granuloma)



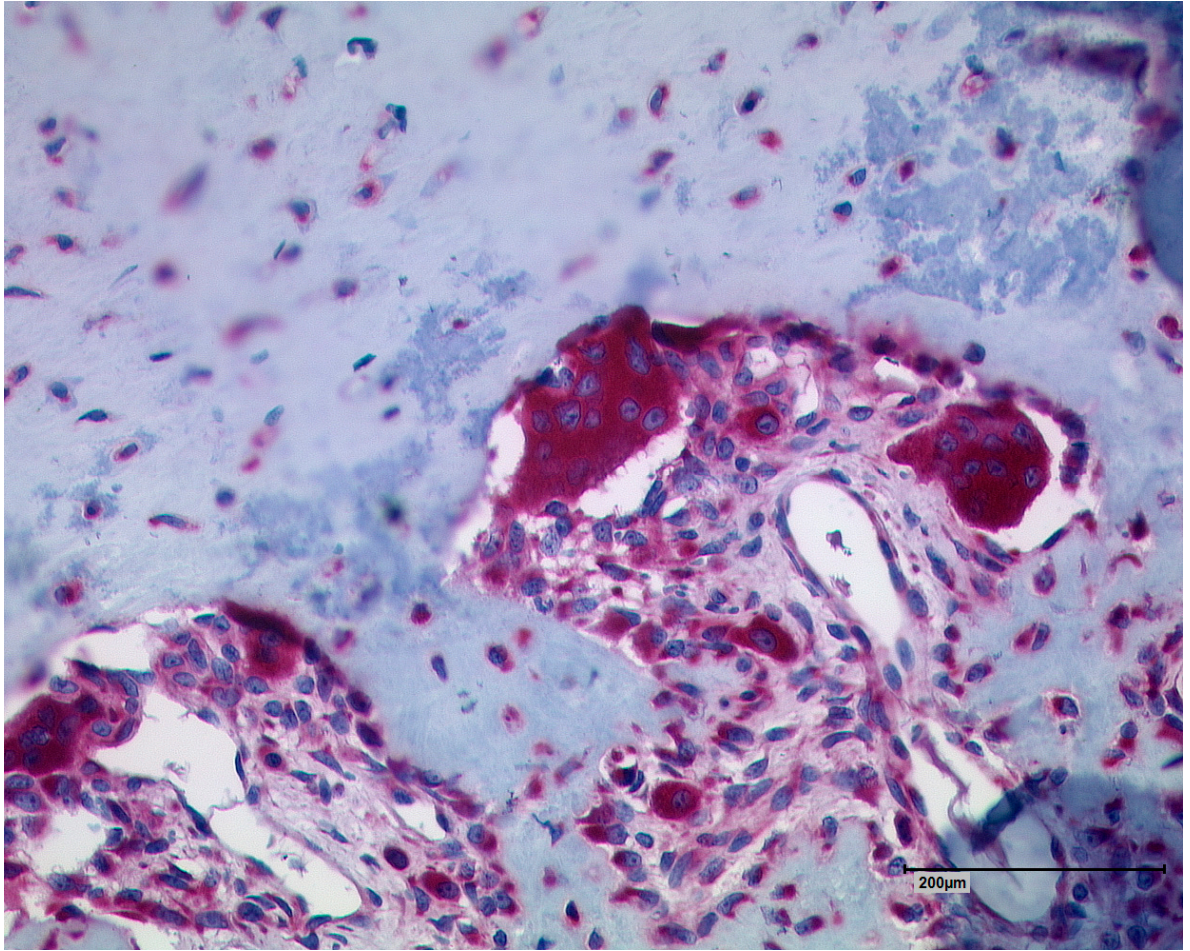

Figure S4: RANK-staining of sample 1 (bony callus)

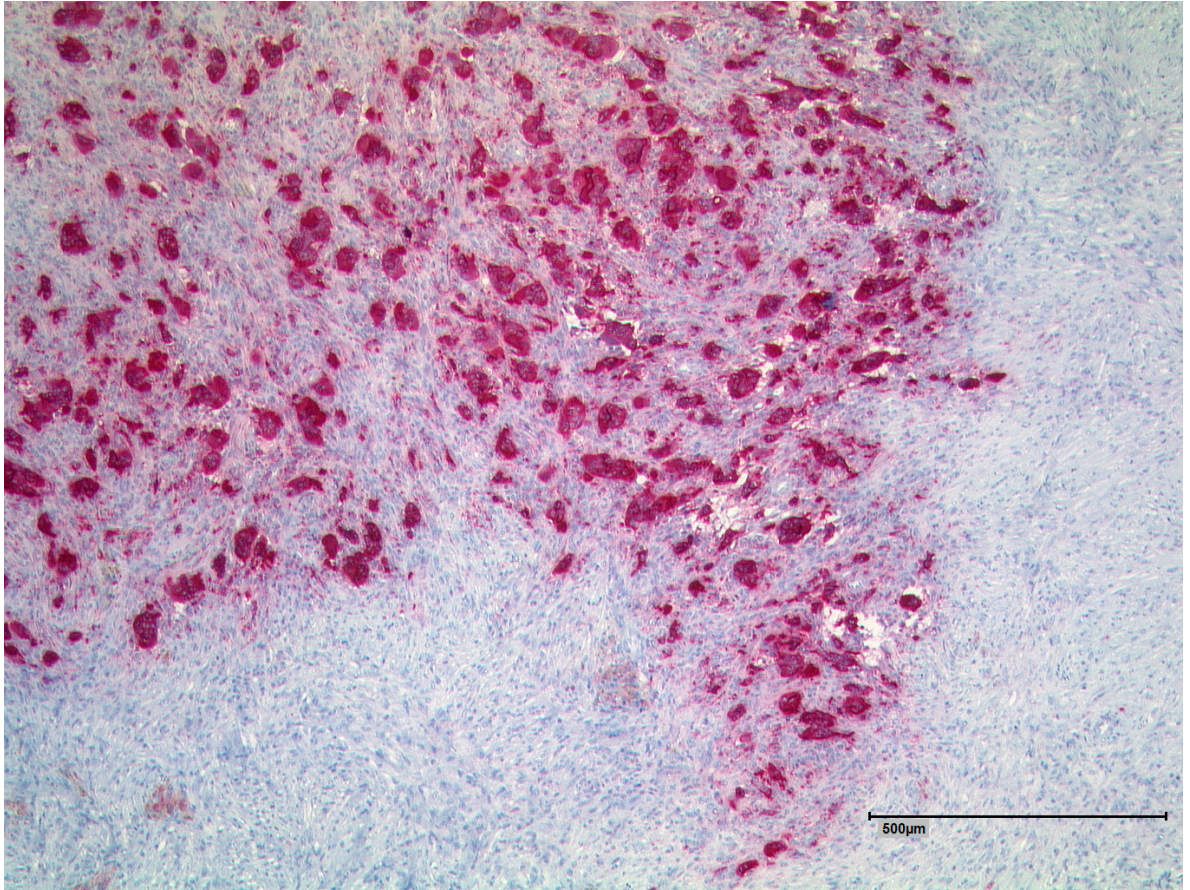

Figure S5: TRAP-staining of sample 24b (GC tumour of the bone).
